# Supplementary material
Source: PubMed Central journal article supplement (PMC2893337)
Supplement: NIHMS215125-supplement-1.pdf [file NIHMS215125-supplement-1.pdf]

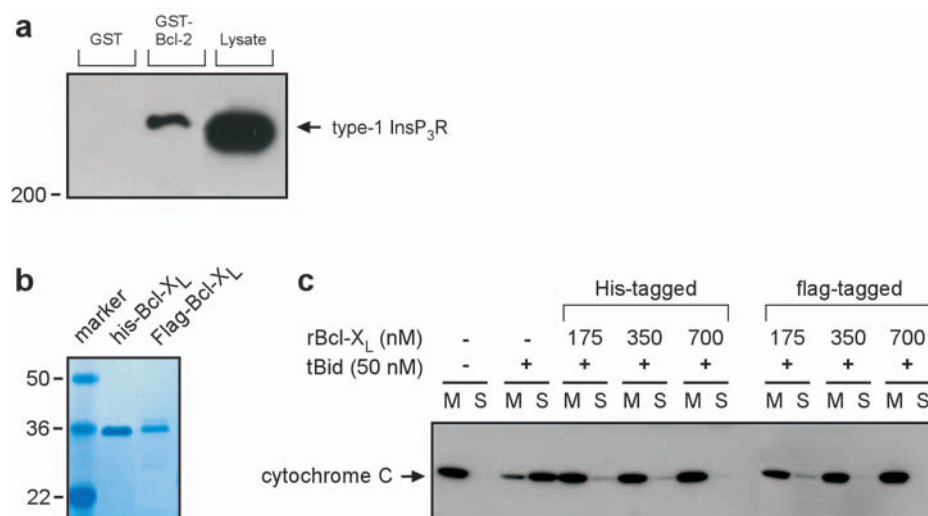

**Figure S1** Interaction of Bcl-2 with type-1 InsP<sub>3</sub>R and inhibition of cytochrome C release from mitochondria under *in vitro* apoptotic conditions is inhibited by recombinant Bcl-X<sub>L</sub>. **a**, Lysates from DT40-InsP<sub>3</sub>R-KO cells stably expressing rat type-1 InsP<sub>3</sub>R were incubated with GST-Bcl-2 and bound InsP<sub>3</sub>R was detected with isoform-specific antibody. **b**, His-hBcl-X<sub>L</sub> and Flag-hBcl-X<sub>L</sub> proteins were purified from bacterial cells or insect cells, respectively, and their purity examined by Coomassie Blue staining.

**c**, Bcl-X<sub>L</sub> inhibits tBid-mediated cytochrome C release. Mitochondria were isolated from a Bak<sup>-/-</sup>Bax<sup>-/-</sup> hematopoietic cell line in which Bax was re-expressed. In the absence of tBid cytochrome C was detected exclusively in the mitochondrial fraction (M). After incubation with tBid cytochrome C was released from mitochondria and detected in the supernatant (S). Addition of Bcl-X<sub>L</sub> blocked the release of cytochrome C in the presence of tBid.

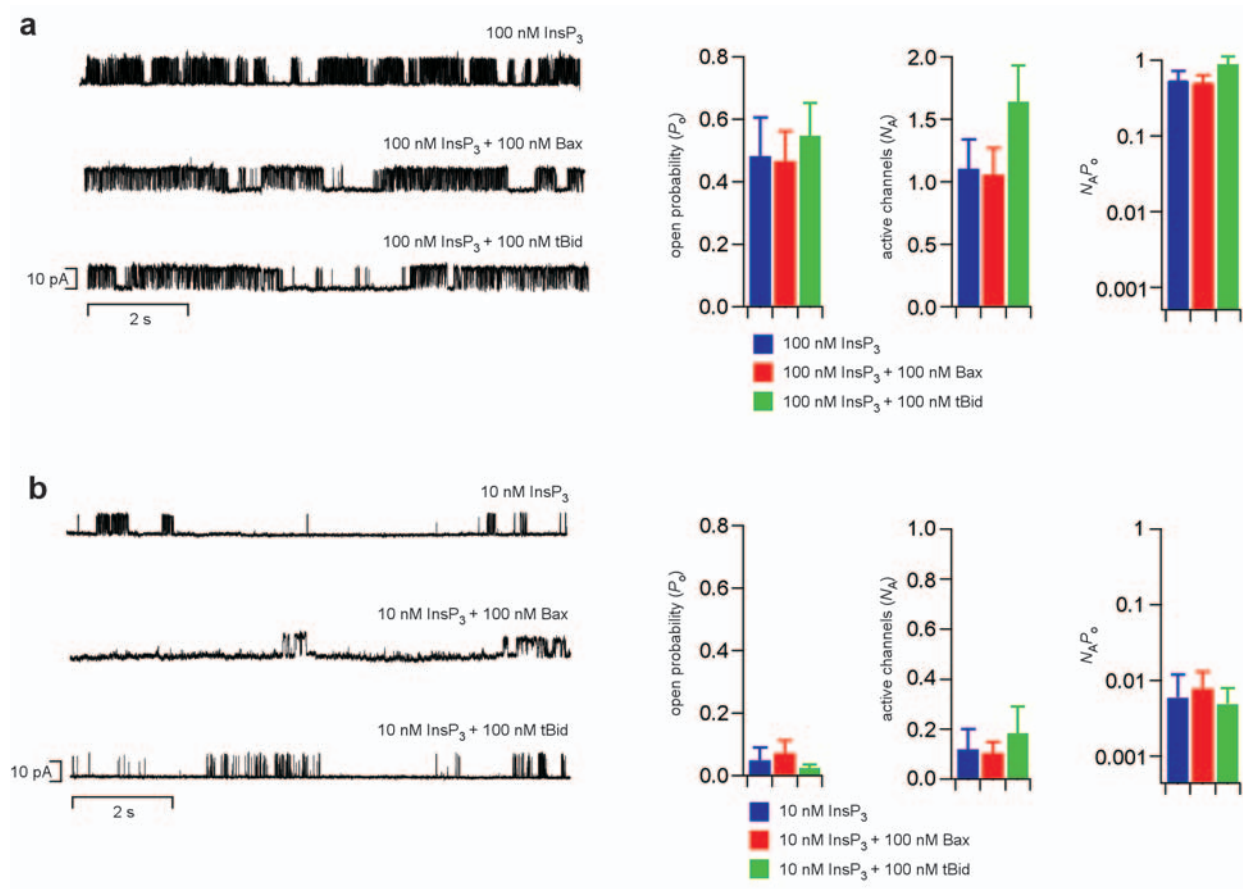

**Figure S2** InsP<sub>3</sub>R activity in the absence of Bcl-X<sub>L</sub> and presence of Bax or tBid. **a**, Typical InsP<sub>3</sub>R current traces in the presence of 100 nM InsP<sub>3</sub> in Sf9 nuclei, pipette [Ca<sup>2+</sup>] was 1  $\mu$ M. Addition of 100 nM tBid or Bax along with 100 nM InsP<sub>3</sub> to the pipette solution had no effect on  $P_o$ ,  $N_A$  or  $N_A P_o$ .

( $P > 0.05$ , unpaired  $t$ -test). **b**, Similarly, in the presence of 10 nM InsP<sub>3</sub>, pipette [Ca<sup>2+</sup>] 0.85  $\mu$ M, addition of 100 nM Bax or tBid had no effect on channel  $P_o$ ,  $N_A$  or  $N_A P_o$ . ( $P > 0.05$ , unpaired  $t$ -test).

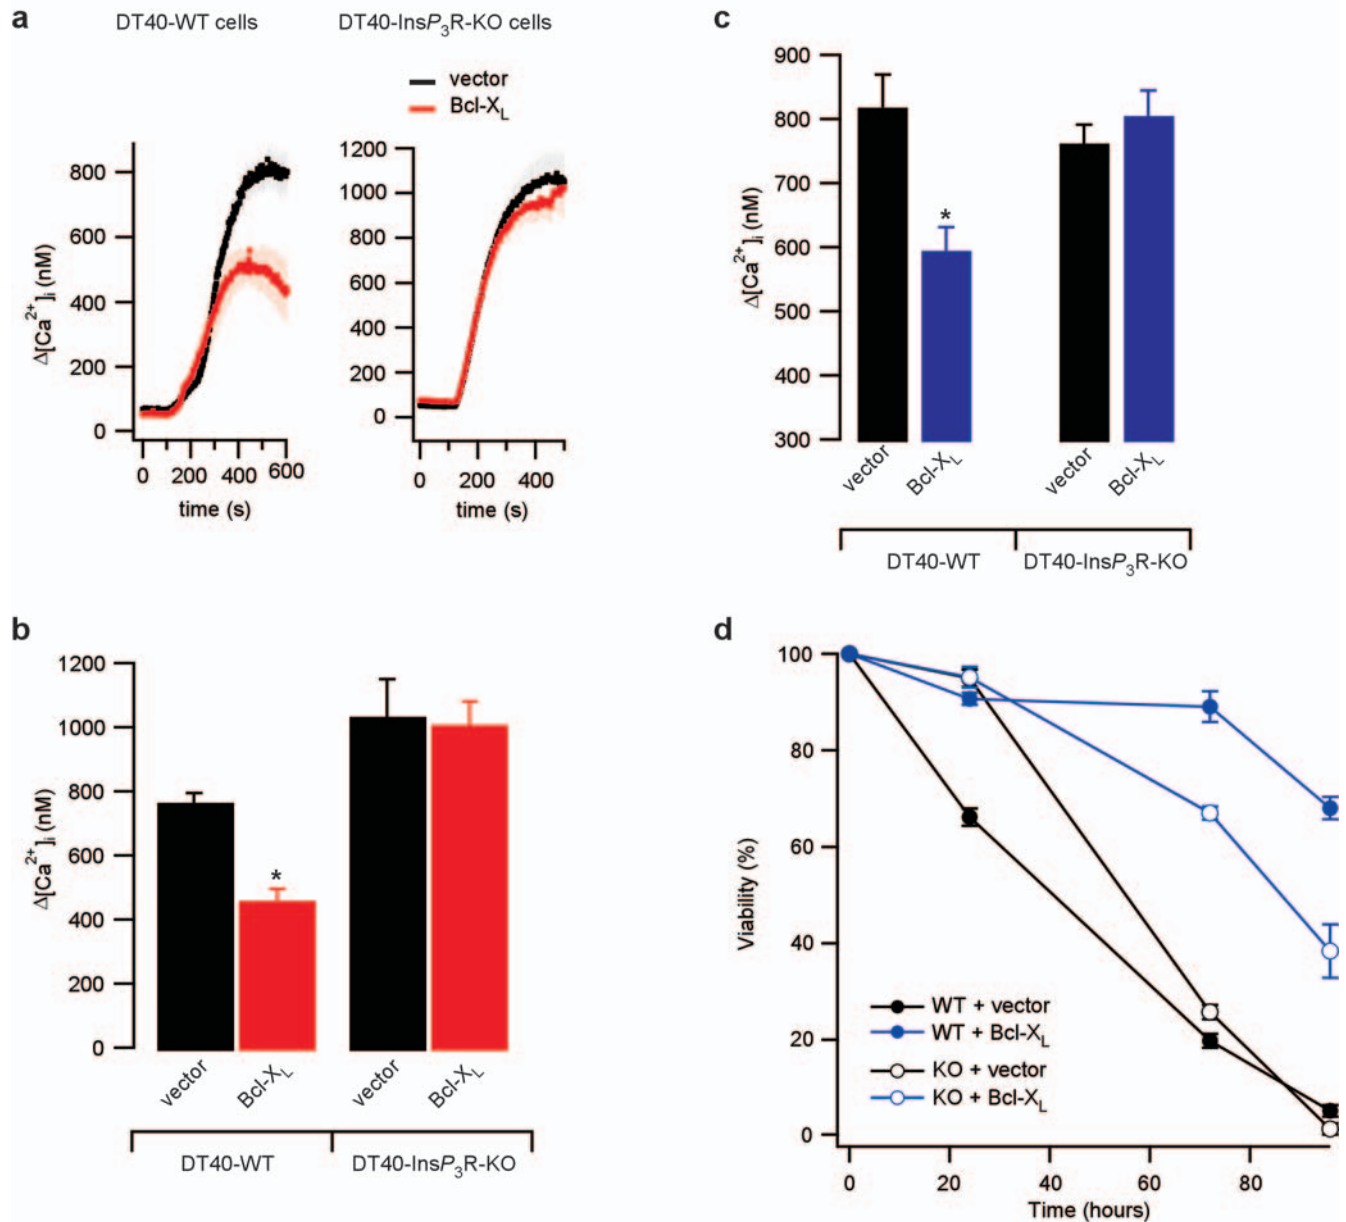

**Figure S3** Interaction of Bcl-X<sub>L</sub> with InsP<sub>3</sub>R is essential for Bcl-X<sub>L</sub> effects on ER Ca<sup>2+</sup> regulation and apoptosis. **a**, Effects of Bcl-X<sub>L</sub> transient expression on Ca<sup>2+</sup><sub>ER</sub>. Typical records depicting change in cytoplasmic [Ca<sup>2+</sup>]<sub>i</sub> ([Ca<sup>2+</sup>]<sub>i</sub>) in response to application of 1 μM thapsigargin in DT40-WT and DT40-InsP<sub>3</sub>R-KO cells transiently transfected with either Bcl-X<sub>L</sub> or vector alone. Each trace represents the mean ± SEM of at least six individual cells within the image field. **b**, Summary of the effects of Bcl-X<sub>L</sub> transient expression on Ca<sup>2+</sup><sub>ER</sub>. Thapsigargin-induced increases in [Ca<sup>2+</sup>]<sub>i</sub> in vector alone and Bcl-X<sub>L</sub>-expressing cell lines. Data represent mean ± SEM for at least 30 individual

cells in two independent transfections. Asterisk indicates P<0.05, ANOVA. **c**, Effects of Bcl-X<sub>L</sub> expression on ER Ca<sup>2+</sup> regulation in independent clones. Summary of the effects of stable Bcl-X<sub>L</sub> expression on Ca<sup>2+</sup><sub>ER</sub>. Thapsigargin-induced increases in [Ca<sup>2+</sup>]<sub>i</sub> in vector alone and Bcl-X<sub>L</sub>-expressing cell lines. Data represent mean ± SEM for at least 30 individual cells in multiple trials. Asterisk indicates P<0.05, ANOVA. **d**, Cell viability after treatment with 20 μg/ml α-IgM (time 0) of DT40-WT (solid symbols) and DT40-InsP<sub>3</sub>R-KO (open symbols) cells stably expressing Bcl-X<sub>L</sub> (Blue) or vector alone (Same clones as in c).

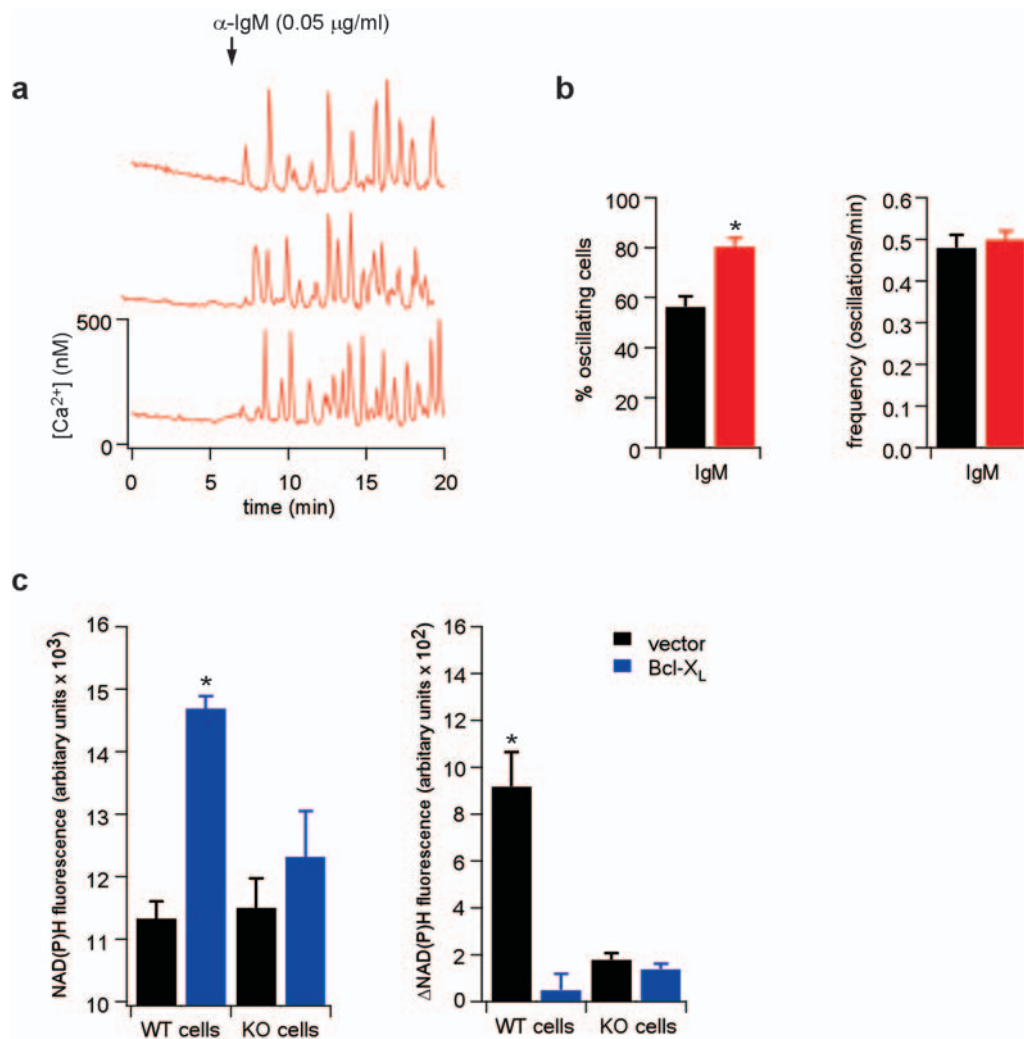

**Figure S4** Receptor stimulation is more sensitively coupled to calcium signalling in Bcl-X<sub>L</sub> expressing cells and modulates mitochondrial NADH levels. **a**,  $[Ca^{2+}]_i$  measurements in DT40-WT cells stably expressing Bcl-X<sub>L</sub>. Receptor stimulation with low concentration of  $\alpha$ -IgM evokes  $Ca^{2+}$  oscillations in many cells that were initially quiescent, examples of three responsive cells are shown. **b**, The percentage of cells that respond to  $\alpha$ -IgM stimulation in this way, and the oscillation frequency is summarised as the

mean  $\pm$  SEM for at least 80 individual cells in no less than two independent trials. Asterisk indicates  $P < 0.0001$ , unpaired  $t$ -test. **c**, The Bcl-X<sub>L</sub> - InsP<sub>3</sub>R interaction modulates mitochondrial NADH levels. The average ( $\pm$  SEM) resting NAD(P)H fluorescence and the change in NAD(P)H fluorescence in response to  $\alpha$ -IgM stimulation for three replicate experiments are plotted. Asterisk indicates  $P < 0.001$ , ANOVA.
